# Supplementary material
Source: publisher figshare collection journal article supplement (https://acs.figshare.com/ndownloader/files/4586071)
Supplement: Supplementary file 1 [file 4586071]

 
data_ch226_0ma 
 
_audit_creation_method            SHELXL-97 
_chemical_name_systematic 
; 
 2,3,6,7,12,13-hexabromotriptycene 
; 
_chemical_name_common             ? 
_chemical_melting_point           ? 
_chemical_formula_moiety          ? 
_chemical_formula_sum 
 'C20 H8 Br6' 
_chemical_formula_weight          727.72 
 
loop_ 
 _atom_type_symbol 
 _atom_type_description 
 _atom_type_scat_dispersion_real 
 _atom_type_scat_dispersion_imag 
 _atom_type_scat_source 
 'C'  'C'   0.0033   0.0016 
 'International Tables Vol C Tables 4.2.6.8 and 6.1.1.4' 
 'H'  'H'   0.0000   0.0000 
 'International Tables Vol C Tables 4.2.6.8 and 6.1.1.4' 
 'Br'  'Br'  -0.2901   2.4595 
 'International Tables Vol C Tables 4.2.6.8 and 6.1.1.4' 
 
_symmetry_cell_setting            monoclinic 
_symmetry_space_group_name_H-M    P21/n 
 
loop_ 
 _symmetry_equiv_pos_as_xyz 
 'x, y, z' 
 '-x+1/2, y+1/2, -z+1/2' 
 '-x, -y, -z' 
 'x-1/2, -y-1/2, z-1/2' 
 
_cell_length_a                    15.4178(8) 
_cell_length_b                    9.5733(5) 
_cell_length_c                    15.4178(8) 
_cell_angle_alpha                 90.00 
_cell_angle_beta                  117.43 
_cell_angle_gamma                 90.00 
_cell_volume                      2019.72(18) 
_cell_formula_units_Z             4 
_cell_measurement_temperature     100(2) 
_cell_measurement_reflns_used     ? 
_cell_measurement_theta_min       ? 
_cell_measurement_theta_max       ? 
 
_exptl_crystal_description        block 
_exptl_crystal_colour             colorless 
_exptl_crystal_size_max           0.14 
_exptl_crystal_size_mid           0.13 
_exptl_crystal_size_min           0.06 
_exptl_crystal_density_meas       ? 
_exptl_crystal_density_diffrn     2.393 
_exptl_crystal_density_method     'not measured' 
_exptl_crystal_F_000              1352 
_exptl_absorpt_coefficient_mu     11.929 
_exptl_absorpt_correction_type    'multi-scan' 
_exptl_absorpt_correction_T_min   0.2840 
_exptl_absorpt_correction_T_max   0.5156 
_exptl_absorpt_process_details    'SADABS V2.10 (Sheldrick, G.M., 2003)' 
 
_exptl_special_details 
; 
 ? 
; 
 
_diffrn_ambient_temperature       100(2) 
_diffrn_radiation_wavelength      0.71073 
_diffrn_radiation_type            MoK\a 
_diffrn_radiation_source          'fine-focus sealed tube' 
_diffrn_radiation_monochromator   graphite 
_diffrn_measurement_device_type   'CCD area detector' 
_diffrn_measurement_method        'phi and omega scans'
_diffrn_detector_area_resol_mean  ? 
_diffrn_standards_number          ? 
_diffrn_standards_interval_count  ? 
_diffrn_standards_interval_time   ? 
_diffrn_standards_decay_%         ? 
_diffrn_reflns_number             36025 
_diffrn_reflns_av_R_equivalents   0.0377 
_diffrn_reflns_av_sigmaI/netI     0.0392 
_diffrn_reflns_limit_h_min        -22 
_diffrn_reflns_limit_h_max        23 
_diffrn_reflns_limit_k_min        -14 
_diffrn_reflns_limit_k_max        14 
_diffrn_reflns_limit_l_min        -22 
_diffrn_reflns_limit_l_max        20 
_diffrn_reflns_theta_min          1.55 
_diffrn_reflns_theta_max          32.91 
_reflns_number_total              7285 
_reflns_number_gt                 5234 
_reflns_threshold_expression      >2sigma(I) 
 
_computing_data_collection        'Bruker SMART' 
_computing_cell_refinement        'Bruker SMART' 
_computing_data_reduction         'Bruker SAINT' 
_computing_structure_solution     'SHELXS-97 (Sheldrick, 1990)' 
_computing_structure_refinement   'SHELXL-97 (Sheldrick, 1997)' 
_computing_molecular_graphics     'Bruker SHELXTL' 
_computing_publication_material   'Bruker SHELXTL' 
 
_refine_special_details 
; 
 Refinement of F^2^ against ALL reflections.  The weighted R-factor wR and 
 goodness of fit S are based on F^2^, conventional R-factors R are based 
 on F, with F set to zero for negative F^2^. The threshold expression of 
 F^2^ > 2sigma(F^2^) is used only for calculating R-factors(gt) etc. and is 
 not relevant to the choice of reflections for refinement.  R-factors based 
 on F^2^ are statistically about twice as large as those based on F, and R- 
 factors based on ALL data will be even larger. 
; 
 
_refine_ls_structure_factor_coef  Fsqd  
_refine_ls_matrix_type            full 
_refine_ls_weighting_scheme       calc  
_refine_ls_weighting_details 
 'calc w=1/[\s^2^(Fo^2^)+(0.0337P)^2^+1.2947P] where P=(Fo^2^+2Fc^2^)/3' 
_atom_sites_solution_primary      direct 
_atom_sites_solution_secondary    difmap 
_atom_sites_solution_hydrogens    geom 
_refine_ls_hydrogen_treatment     constr 
_refine_ls_extinction_method      none 
_refine_ls_extinction_coef        ? 
_refine_ls_number_reflns          7285 
_refine_ls_number_parameters      235 
_refine_ls_number_restraints      0 
_refine_ls_R_factor_all           0.0598 
_refine_ls_R_factor_gt            0.0316 
_refine_ls_wR_factor_ref          0.0728 
_refine_ls_wR_factor_gt           0.0654 
_refine_ls_goodness_of_fit_ref    1.023 
_refine_ls_restrained_S_all       1.023 
_refine_ls_shift/su_max           0.002 
_refine_ls_shift/su_mean          0.000 
 
loop_ 
 _atom_site_label 
 _atom_site_type_symbol 
 _atom_site_fract_x 
 _atom_site_fract_y 
 _atom_site_fract_z 
 _atom_site_U_iso_or_equiv 
 _atom_site_adp_type 
 _atom_site_occupancy 
 _atom_site_symmetry_multiplicity 
 _atom_site_calc_flag 
 _atom_site_refinement_flags 
 _atom_site_disorder_assembly 
 _atom_site_disorder_group 
Br1 Br 0.35682(2) 1.02052(3) 0.97240(2) 0.02196(7) Uani 1 1 d . . . 
Br2 Br -0.11108(2) 0.20295(3) 0.82276(2) 0.02190(7) Uani 1 1 d . . . 
Br3 Br -0.191023(19) 1.00715(3) 0.38196(2) 0.01989(7) Uani 1 1 d . . . 
Br4 Br -0.333618(19) 1.04723(3) 0.49188(2) 0.02255(7) Uani 1 1 d . . . 
Br5 Br 0.21553(2) 1.06418(3) 1.08378(2) 0.02378(7) Uani 1 1 d . . . 
Br6 Br 0.03212(2) 0.15430(3) 0.71250(2) 0.02540(7) Uani 1 1 d . . . 
C1 C 0.05372(17) 0.7167(3) 0.70518(18) 0.0126(5) Uani 1 1 d . . . 
H1 H 0.0953 0.7016 0.6719 0.015 Uiso 1 1 calc R . . 
C2 C -0.03876(17) 0.6017(3) 0.77853(19) 0.0127(5) Uani 1 1 d . . . 
C3 C 0.02010(17) 0.5812(3) 0.73224(18) 0.0127(5) Uani 1 1 d . . . 
C4 C 0.10467(18) 0.7999(3) 0.79975(19) 0.0130(5) Uani 1 1 d . . . 
C5 C -0.05594(17) 0.7551(3) 0.79095(18) 0.0128(5) Uani 1 1 d . . . 
H5 H -0.0976 0.7700 0.8242 0.015 Uiso 1 1 calc R . . 
C6 C -0.04000(17) 0.7986(3) 0.64317(19) 0.0133(5) Uani 1 1 d . . . 
C7 C 0.04544(18) 0.8207(3) 0.84564(19) 0.0139(5) Uani 1 1 d . . . 
C8 C 0.1728(2) 0.9561(3) 0.9691(2) 0.0169(5) Uani 1 1 d . . . 
C9 C -0.06838(18) 0.8533(3) 0.55161(19) 0.0133(5) Uani 1 1 d . . . 
H9 H -0.0291 0.8397 0.5196 0.016 Uiso 1 1 calc R . . 
C10 C -0.07591(18) 0.4887(3) 0.8068(2) 0.0150(5) Uani 1 1 d . . . 
H10 H -0.1151 0.5026 0.8389 0.018 Uiso 1 1 calc R . . 
C11 C -0.18586(17) 0.8923(3) 0.64421(19) 0.0143(5) Uani 1 1 d . . . 
H11 H -0.2253 0.9054 0.6761 0.017 Uiso 1 1 calc R . . 
C12 C -0.15567(18) 0.9292(3) 0.50591(19) 0.0150(5) Uani 1 1 d . . . 
C13 C 0.07899(19) 0.8974(3) 0.93028(19) 0.0152(5) Uani 1 1 d . . . 
H13 H 0.0393 0.9105 0.9619 0.018 Uiso 1 1 calc R . . 
C14 C -0.09908(18) 0.8182(3) 0.68929(19) 0.0129(5) Uani 1 1 d . . . 
C15 C 0.19805(18) 0.8563(3) 0.83920(19) 0.0146(5) Uani 1 1 d . . . 
H15 H 0.2387 0.8402 0.8090 0.018 Uiso 1 1 calc R . . 
C16 C 0.04147(18) 0.4476(3) 0.71433(19) 0.0150(5) Uani 1 1 d . . . 
H16 H 0.0821 0.4332 0.6839 0.018 Uiso 1 1 calc R . . 
C17 C -0.21418(17) 0.9471(3) 0.55195(19) 0.0141(5) Uani 1 1 d . . . 
C18 C -0.05486(18) 0.3548(3) 0.7875(2) 0.0155(5) Uani 1 1 d . . . 
C19 C 0.23126(18) 0.9367(3) 0.9236(2) 0.0159(5) Uani 1 1 d . . . 
C20 C 0.00301(18) 0.3345(3) 0.74135(19) 0.0155(5) Uani 1 1 d . . . 
 
loop_ 
 _atom_site_aniso_label 
 _atom_site_aniso_U_11 
 _atom_site_aniso_U_22 
 _atom_site_aniso_U_33 
 _atom_site_aniso_U_23 
 _atom_site_aniso_U_13 
 _atom_site_aniso_U_12 
Br1 0.01948(13) 0.02449(15) 0.01799(15) -0.00163(11) 0.00528(11) -0.00756(10) 
Br2 0.02819(14) 0.01325(13) 0.02803(17) 0.00288(11) 0.01617(12) -0.00217(10) 
Br3 0.01946(12) 0.02446(15) 0.01439(14) 0.00660(11) 0.00662(11) 0.00270(10) 
Br4 0.01841(12) 0.02872(16) 0.01815(15) 0.00459(12) 0.00638(11) 0.00946(11) 
Br5 0.02981(15) 0.02402(16) 0.01554(15) -0.00758(12) 0.00877(12) -0.00753(11) 
Br6 0.03759(16) 0.01091(13) 0.03375(18) -0.00122(12) 0.02162(14) 0.00282(11) 
C1 0.0158(11) 0.0120(12) 0.0113(13) -0.0003(9) 0.0073(10) -0.0001(9) 
C2 0.0139(10) 0.0120(12) 0.0113(12) -0.0002(9) 0.0049(9) -0.0007(9) 
C3 0.0145(11) 0.0125(12) 0.0091(12) -0.0010(9) 0.0037(9) 0.0008(9) 
C4 0.0168(11) 0.0093(12) 0.0112(13) 0.0026(9) 0.0049(9) 0.0029(9) 
C5 0.0154(11) 0.0124(12) 0.0116(13) -0.0003(10) 0.0070(10) 0.0001(9) 
C6 0.0139(11) 0.0099(12) 0.0140(13) -0.0014(9) 0.0048(10) -0.0011(9) 
C7 0.0164(11) 0.0099(12) 0.0137(13) 0.0018(9) 0.0054(10) 0.0018(9) 
C8 0.0227(12) 0.0143(13) 0.0105(13) -0.0006(10) 0.0050(10) 0.0006(10) 
C9 0.0167(11) 0.0117(12) 0.0120(13) -0.0016(9) 0.0070(10) -0.0027(9) 
C10 0.0145(11) 0.0175(13) 0.0131(13) 0.0012(10) 0.0064(10) -0.0003(9) 
C11 0.0129(10) 0.0160(13) 0.0127(13) -0.0006(10) 0.0049(10) 0.0005(9) 
C12 0.0164(11) 0.0155(13) 0.0104(13) 0.0010(10) 0.0040(10) -0.0008(9) 
C13 0.0213(12) 0.0119(12) 0.0127(13) -0.0003(10) 0.0081(10) 0.0010(9) 
C14 0.0163(11) 0.0091(12) 0.0119(13) -0.0017(9) 0.0054(10) -0.0021(9) 
C15 0.0169(11) 0.0130(12) 0.0132(13) 0.0027(10) 0.0063(10) 0.0009(9) 
C16 0.0164(11) 0.0155(13) 0.0135(13) 0.0003(10) 0.0073(10) 0.0014(9) 
C17 0.0126(10) 0.0121(12) 0.0133(13) 0.0001(10) 0.0022(9) 0.0022(9) 
C18 0.0169(11) 0.0117(12) 0.0156(14) 0.0030(10) 0.0055(10) -0.0016(9) 
C19 0.0159(11) 0.0128(12) 0.0138(13) 0.0025(10) 0.0024(10) -0.0015(9) 
C20 0.0197(12) 0.0100(12) 0.0138(13) -0.0009(10) 0.0053(10) 0.0028(9) 
 
_geom_special_details 
; 
 All esds (except the esd in the dihedral angle between two l.s. planes) 
 are estimated using the full covariance matrix.  The cell esds are taken 
 into account individually in the estimation of esds in distances, angles 
 and torsion angles; correlations between esds in cell parameters are only 
 used when they are defined by crystal symmetry.  An approximate (isotropic) 
 treatment of cell esds is used for estimating esds involving l.s. planes. 
; 
 
loop_ 
 _geom_bond_atom_site_label_1 
 _geom_bond_atom_site_label_2 
 _geom_bond_distance 
 _geom_bond_site_symmetry_2 
 _geom_bond_publ_flag 
Br1 C19 1.902(3) . ? 
Br2 C18 1.896(3) . ? 
Br3 C12 1.883(3) . ? 
Br4 C17 1.896(2) . ? 
Br5 C8 1.886(3) . ? 
Br6 C20 1.887(3) . ? 
C1 C4 1.524(4) . ? 
C1 C3 1.525(4) . ? 
C1 C6 1.531(3) . ? 
C2 C10 1.385(4) . ? 
C2 C3 1.403(3) . ? 
C2 C5 1.519(4) . ? 
C3 C16 1.380(4) . ? 
C4 C15 1.388(3) . ? 
C4 C7 1.403(4) . ? 
C5 C14 1.518(4) . ? 
C5 C7 1.528(3) . ? 
C6 C9 1.374(4) . ? 
C6 C14 1.403(4) . ? 
C7 C13 1.374(4) . ? 
C8 C19 1.387(4) . ? 
C8 C13 1.403(4) . ? 
C9 C12 1.401(3) . ? 
C10 C18 1.388(4) . ? 
C11 C17 1.384(4) . ? 
C11 C14 1.386(3) . ? 
C12 C17 1.392(4) . ? 
C15 C19 1.390(4) . ? 
C16 C20 1.387(4) . ? 
C18 C20 1.387(4) . ? 
 
loop_ 
 _geom_angle_atom_site_label_1 
 _geom_angle_atom_site_label_2 
 _geom_angle_atom_site_label_3 
 _geom_angle 
 _geom_angle_site_symmetry_1 
 _geom_angle_site_symmetry_3 
 _geom_angle_publ_flag 
C4 C1 C3 105.9(2) . . ? 
C4 C1 C6 104.6(2) . . ? 
C3 C1 C6 105.35(19) . . ? 
C10 C2 C3 120.6(2) . . ? 
C10 C2 C5 126.4(2) . . ? 
C3 C2 C5 113.0(2) . . ? 
C16 C3 C2 120.1(2) . . ? 
C16 C3 C1 126.2(2) . . ? 
C2 C3 C1 113.7(2) . . ? 
C15 C4 C7 120.6(2) . . ? 
C15 C4 C1 126.6(2) . . ? 
C7 C4 C1 112.8(2) . . ? 
C14 C5 C2 105.9(2) . . ? 
C14 C5 C7 104.9(2) . . ? 
C2 C5 C7 105.9(2) . . ? 
C9 C6 C14 119.7(2) . . ? 
C9 C6 C1 126.8(2) . . ? 
C14 C6 C1 113.5(2) . . ? 
C13 C7 C4 120.5(2) . . ? 
C13 C7 C5 125.9(2) . . ? 
C4 C7 C5 113.7(2) . . ? 
C19 C8 C13 120.8(3) . . ? 
C19 C8 Br5 121.4(2) . . ? 
C13 C8 Br5 117.8(2) . . ? 
C6 C9 C12 119.4(2) . . ? 
C2 C10 C18 118.8(2) . . ? 
C17 C11 C14 118.9(2) . . ? 
C17 C12 C9 120.4(2) . . ? 
C17 C12 Br3 121.08(19) . . ? 
C9 C12 Br3 118.54(19) . . ? 
C7 C13 C8 118.8(2) . . ? 
C11 C14 C6 121.1(2) . . ? 
C11 C14 C5 125.8(2) . . ? 
C6 C14 C5 113.1(2) . . ? 
C4 C15 C19 119.1(2) . . ? 
C3 C16 C20 119.3(2) . . ? 
C11 C17 C12 120.4(2) . . ? 
C11 C17 Br4 117.96(19) . . ? 
C12 C17 Br4 121.7(2) . . ? 
C20 C18 C10 120.6(2) . . ? 
C20 C18 Br2 121.8(2) . . ? 
C10 C18 Br2 117.6(2) . . ? 
C8 C19 C15 120.2(2) . . ? 
C8 C19 Br1 121.6(2) . . ? 
C15 C19 Br1 118.2(2) . . ? 
C18 C20 C16 120.6(2) . . ? 
C18 C20 Br6 121.9(2) . . ? 
C16 C20 Br6 117.5(2) . . ? 
 
_diffrn_measured_fraction_theta_max    0.962 
_diffrn_reflns_theta_full              32.91 
_diffrn_measured_fraction_theta_full   0.962 
_refine_diff_density_max    1.505 
_refine_diff_density_min   -0.720 
_refine_diff_density_rms    0.168 
